# Supplementary material for: A smart all-in-one theranostic platform for CT imaging guided tumor microwave thermotherapy based on IL@ZrO2 nanoparticles
Source: PubMed Central journal article supplement — Chem Sci. 2015 May 29;6(8):5016–26. doi: 10.1039/c5sc00781j (PMC6088435; doi:10.1039/c5sc00781j), 2015-05-29
Supplement: SC-006-C5SC00781J-s001.pdf [file SC-006-C5SC00781J-s001.pdf]

## Supporting Information

### **A Smart All-in-One Theranostic Platform for CT Imaging Guided Tumor Microwave Thermotherapy based on IL@ZrO<sub>2</sub> Nanoparticles**

*Haitang Shi,<sup>a,b,‡</sup> Meng Niu,<sup>c,‡</sup> Longfei Tan,<sup>a,‡</sup> Tianlong Liu,<sup>a</sup> Haibo Shao,<sup>c</sup> Changhui Fu,<sup>a</sup> Xiangling Ren,<sup>a</sup>  
Tengchuang Ma,<sup>c</sup> Jun Ren,<sup>a</sup> Linlin Li,<sup>a</sup> Huiyu Liu,<sup>a</sup> Ke Xu,<sup>c,\*</sup> Jianxin Wang,<sup>d</sup> Fangqiong Tang,<sup>a</sup> and  
Xianwei Meng,<sup>a,\*</sup>*

<sup>a</sup> Laboratory of Controllable Preparation and Application of Nanomaterials, Center for Micro/nanomaterials and Technology, Technical Institute of Physics and Chemistry, Chinese Academy of Sciences, Beijing 100190, People's Republic of China. E-mail: mengxw@mail.ipc.ac.cn; Fax: +86-10-62554670; Tel: +86-10-82543521.

<sup>b</sup> University of Chinese Academy of Sciences, Beijing 100049, People's Republic of China.

<sup>c</sup> Department of Radiology, First Hospital of China Medical University, Shenyang 110001, People's Republic of China. Email: kexu@vip.sina.com.

<sup>d</sup> Beijing M&Y Electronics Co. Ltd. Beijing 100015. People's Republic of China.

<sup>‡</sup> These authors contributed equally to this work.

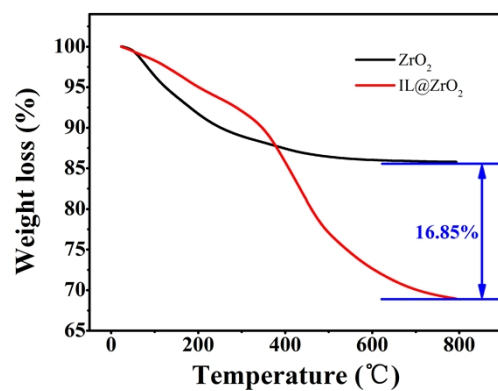

Fig. S1 TGA curves of ZrO<sub>2</sub> and IL@ZrO<sub>2</sub>. The temperature increased from room temperature to 800 °C, with the rate of 10 °C /min at nitrogen flow.

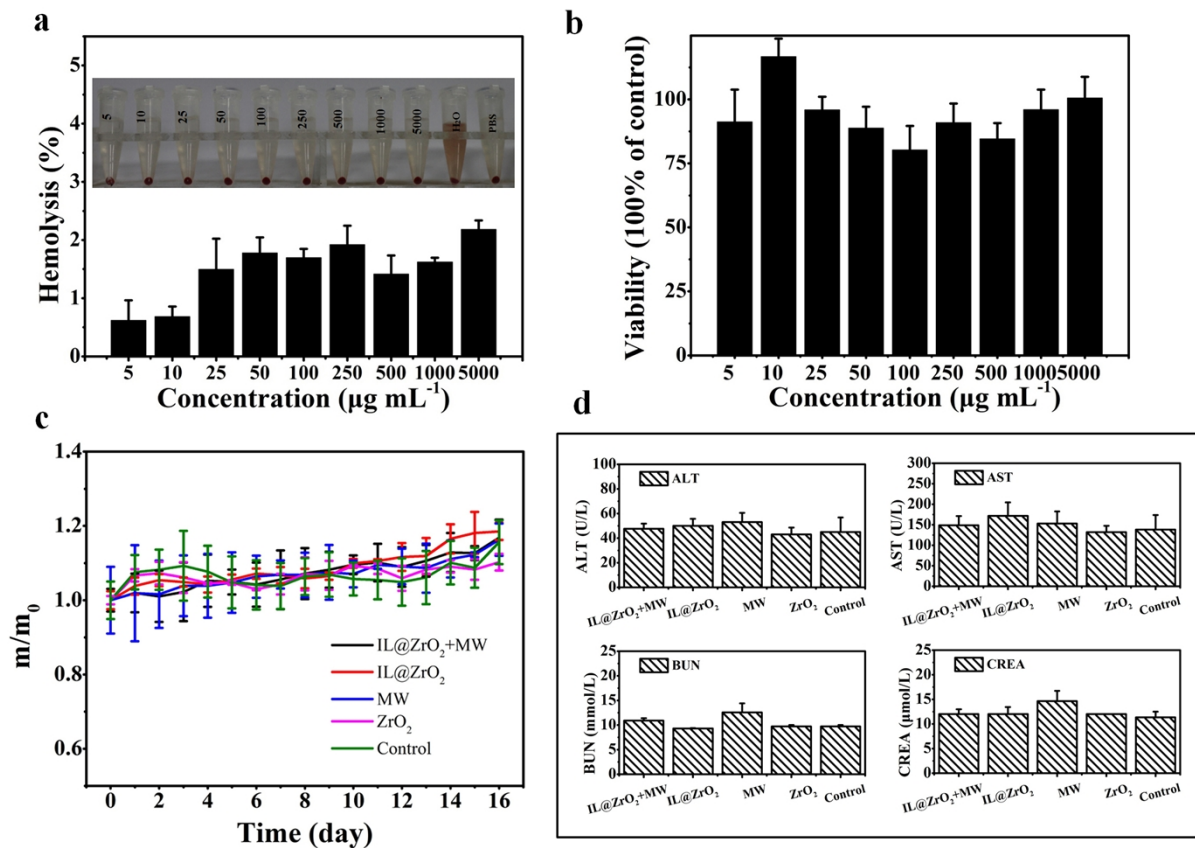

Fig. S2 Toxicity evaluation of the IL@ZrO<sub>2</sub> nanoparticles *in vitro* and *in vivo*. (a) Hemolysis ratio of IL@ZrO<sub>2</sub> with different concentrations, inset represents the hemolysis images the tubes represent 5, 10, 25, 50, 100, 250, 500, 1000, 5000  $\mu\text{g mL}^{-1}$ , positive control group, and negative control group from left to right, respectively (n=3 in each treatment group). (b) Cell viability after incubating HepG2 cells for 24 h with IL@ZrO<sub>2</sub> of different concentrations, with showing low cytotoxicity (n=5 in each treatment group). (c) Effects of IL@ZrO<sub>2</sub>, ZrO<sub>2</sub> and microwave on body weight of ICR mice. (d) Effects of IL@ZrO<sub>2</sub>, ZrO<sub>2</sub> and microwave on clinical blood biochemistry indexes of ICR mice.

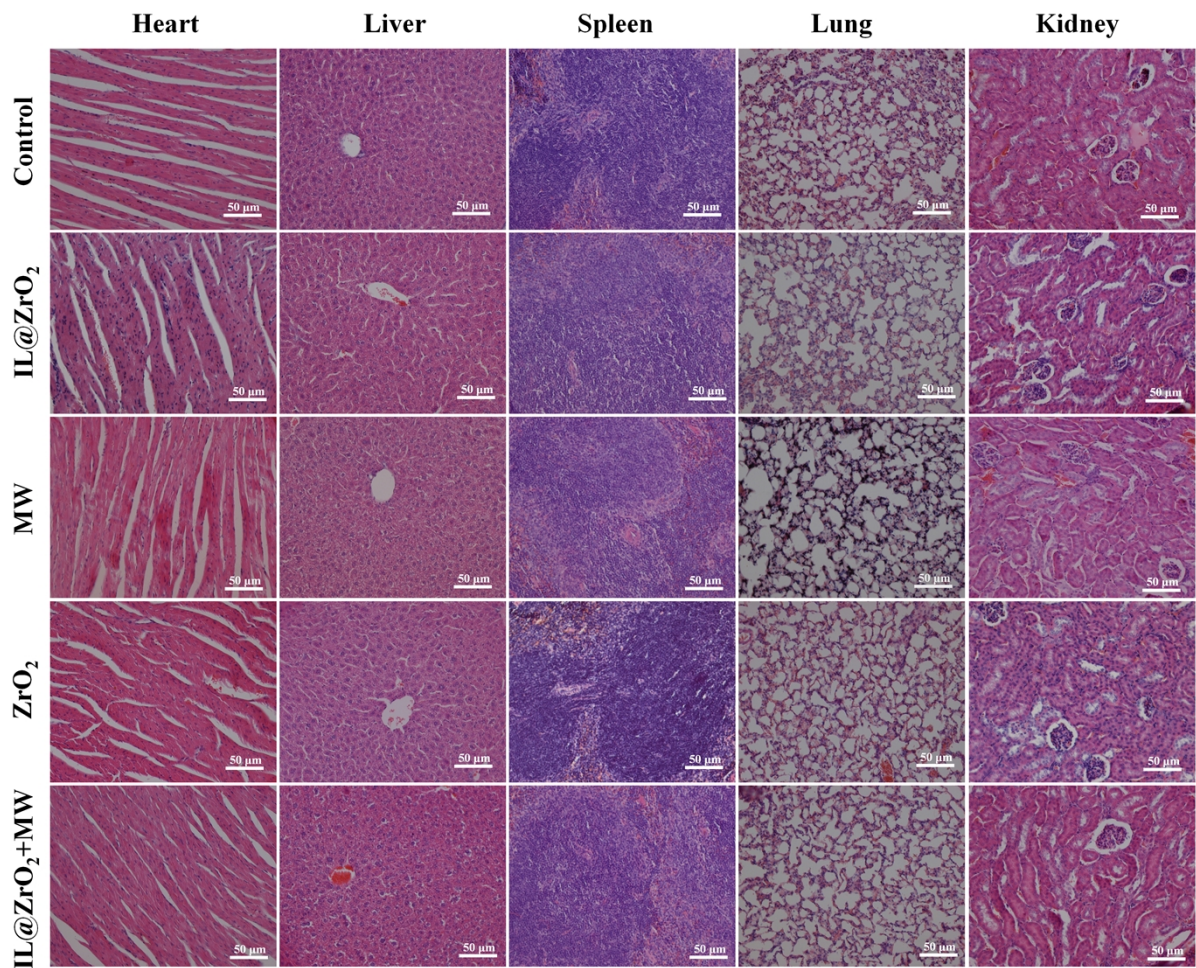

Fig. S3 Toxicity evaluation of IL@ZrO<sub>2</sub> via histological study. Histological section of heart, liver, spleen, lung and kidney obtained from healthy ICR mice in each group after excision in 16 days.

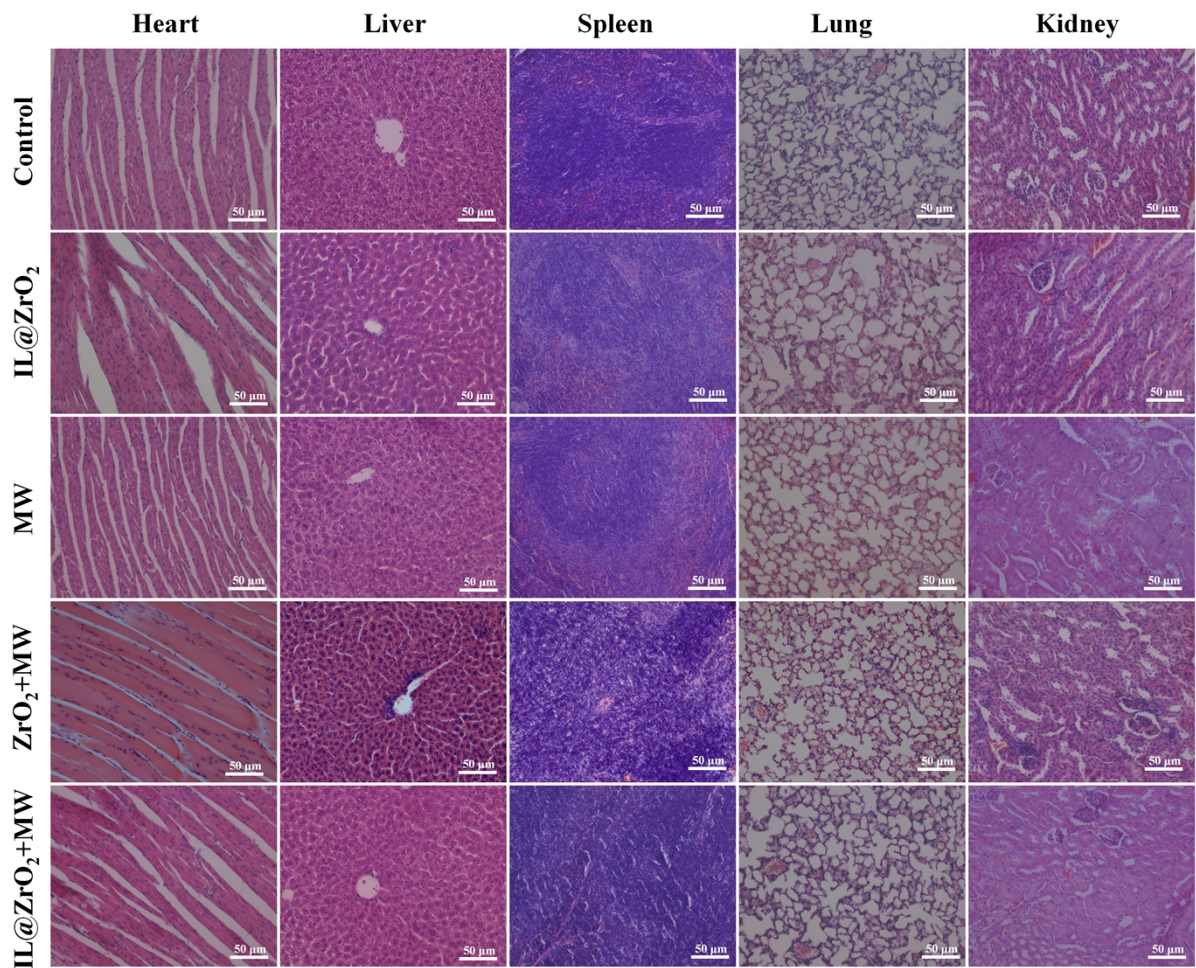

Fig. S4 Evaluation of microwave thermal therapy efficiency *in vivo* via histological study. Histological section of heart, liver, spleen, lung, and kidney obtained from ICR mice in each group after excision in 16 days.

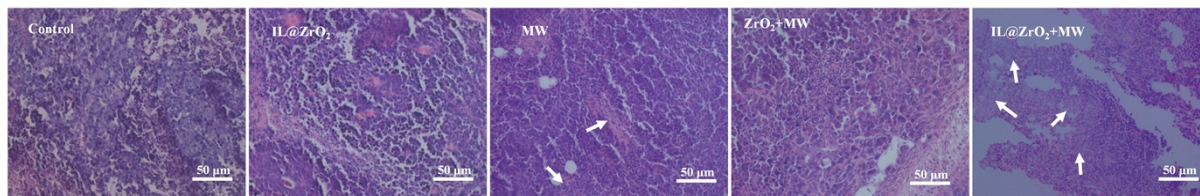

Fig. S5 Evaluation of microwave thermal therapy efficiency *in vivo* via histological study. Histological section of tumor obtained from ICR mice in each group after excision in 16 days.

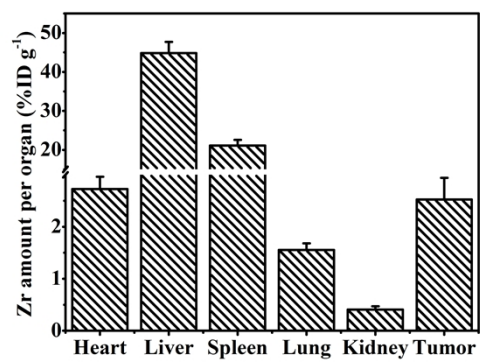

Fig. S6 ICP-MS analysis results of IL@ZrO<sub>2</sub> levels in tissues of ICR mice, including heart, liver, spleen, lung, kidney and tumor, 12h post intravenous injection.

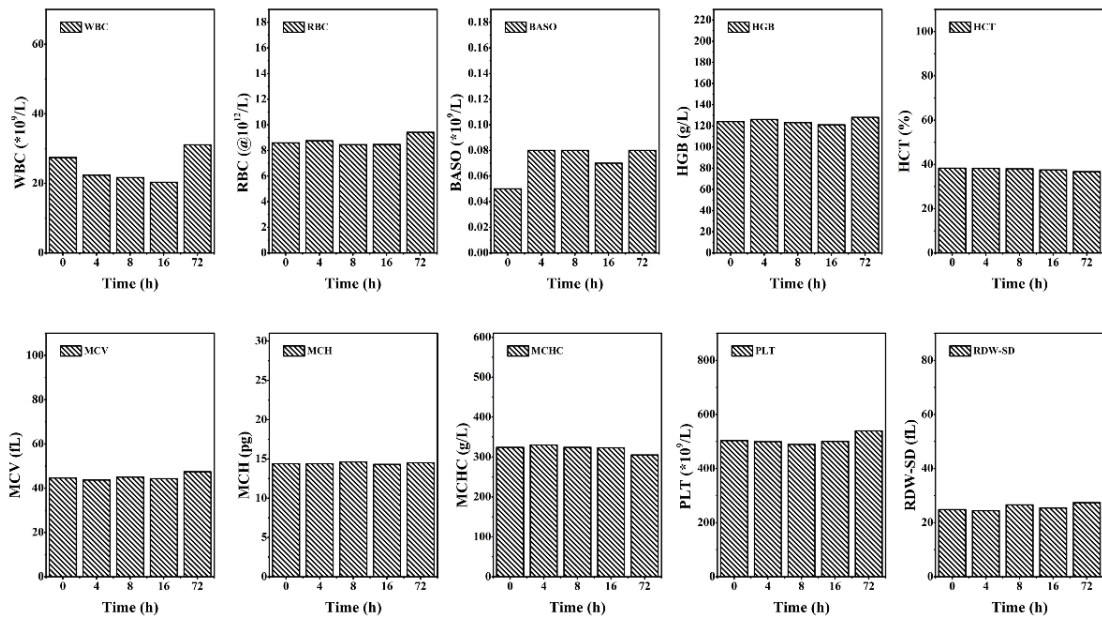

Fig. S7 Hematology biochemical indicators at different time points prior to and post injection.



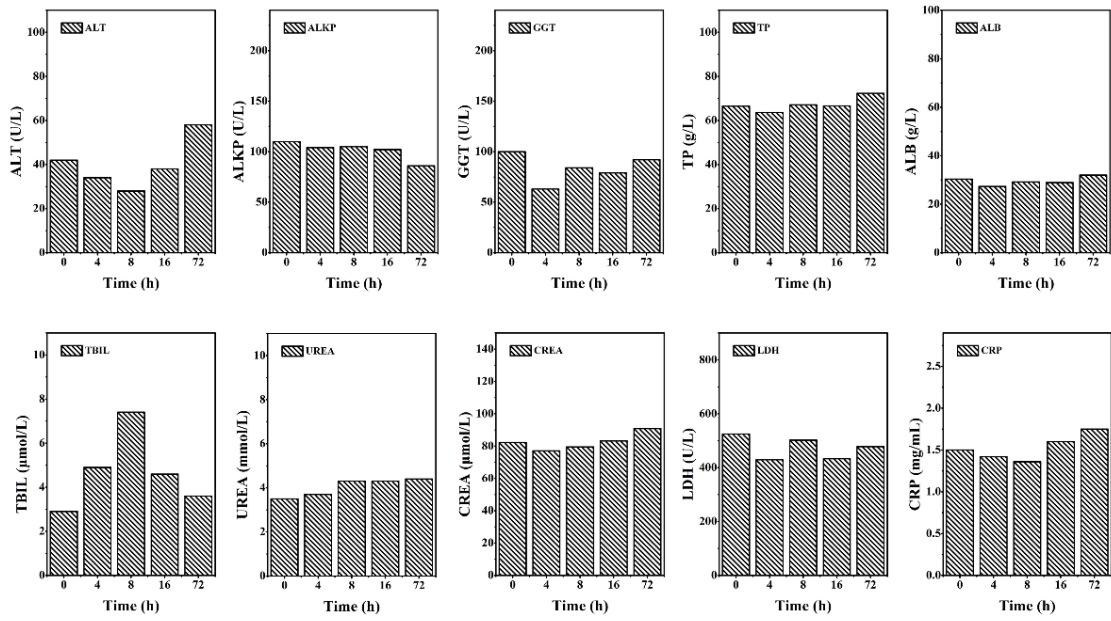

Fig. S8 Serum biochemical indicators at different time points prior to and post injection.

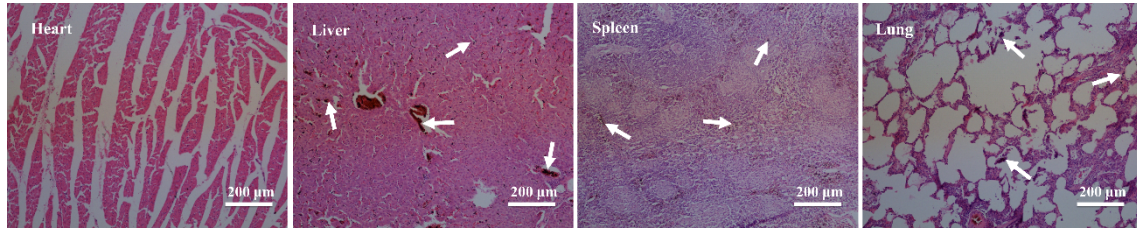

Fig. S9 Histological section of heart, liver, spleen and lung obtained from mini swine after excision in 10 days.
